# Supplementary material for: A flexible tris-phosphonate for the design of copper and cobalt coordination polymers: unusual cage array topology and magnetic properties
Source: Royal Society of Chemistry journal article supplement (doi:10.1039/c0ce00439a), 2011-01-01
Supplement: c0ce00439a.pdf [file c0ce00439a.pdf]

# Supporting Information

## **A Flexible Tris-phosphonate for the Design of Copper and Cobalt Coordination Polymers: Unusual Cage Array Topology and Magnetic Properties**

Chen-I Yang,<sup>a</sup> Yu-Tang Song,<sup>a,b</sup> Yung-Jie Yeh,<sup>a,b</sup> Yen-Hsiang Liu,<sup>c</sup> Tien-Wen Tseng,<sup>b\*</sup>

Kuang-Lieh Lu<sup>a\*</sup>

<sup>a</sup> Institute of Chemistry, Academia Sinica, Taipei 115, Taiwan

<sup>b</sup> Department of Chemical Engineering, National Taipei University of Technology, Taipei 106, Taiwan

<sup>c</sup> Department of Chemistry, Fu Jen Catholic University, Taipei 242, Taiwan

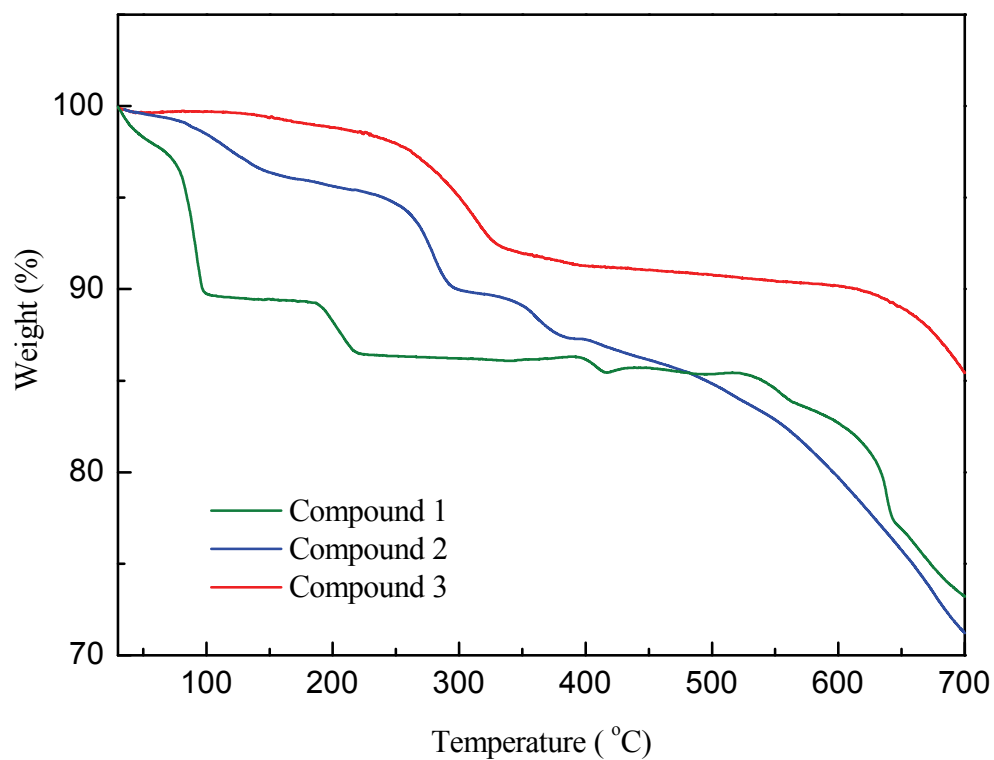

**Fig. S1.** Thermogravimetric (TG) analysis diagrams of **1**·H<sub>2</sub>O (green line), **2** (blue line), and **3** (red line).

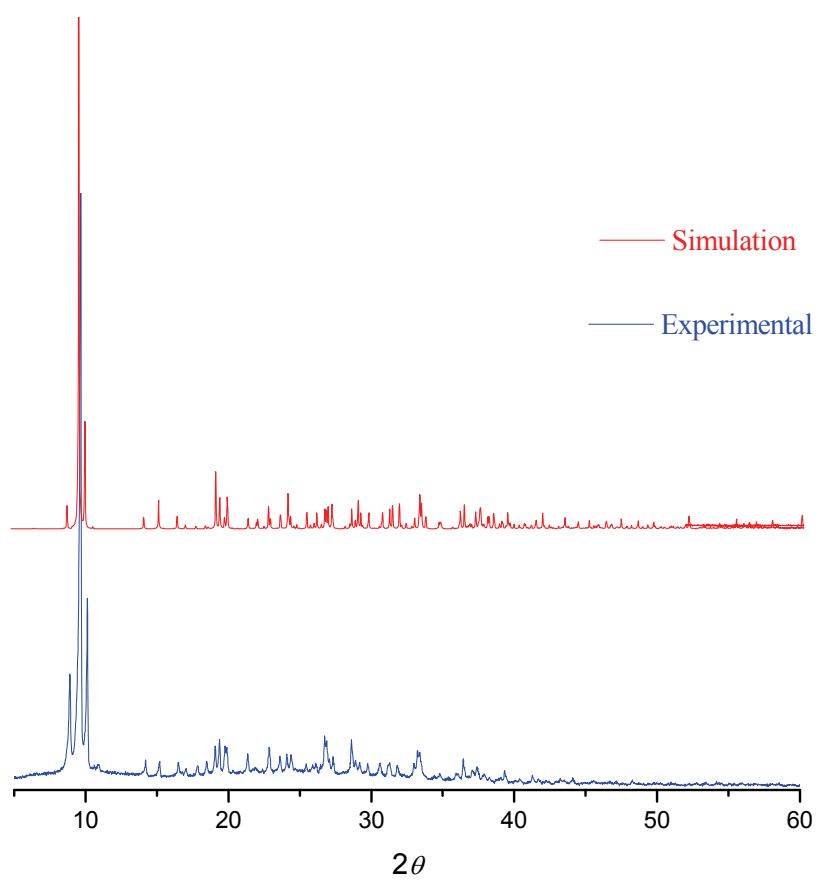

**Fig. S2.** Simulated PXRD pattern (red) and experimental PXRD pattern of  $1 \cdot H_2O$ .

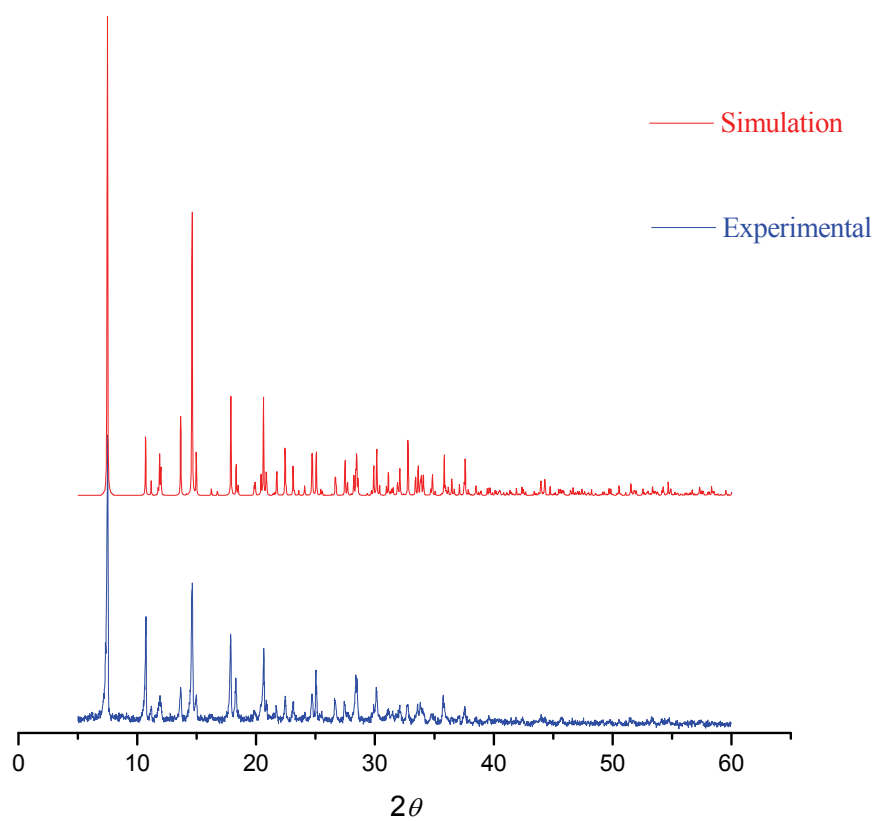

**Fig. S3.** Simulated PXRD pattern (red) and experimental PXRD pattern of **2**.

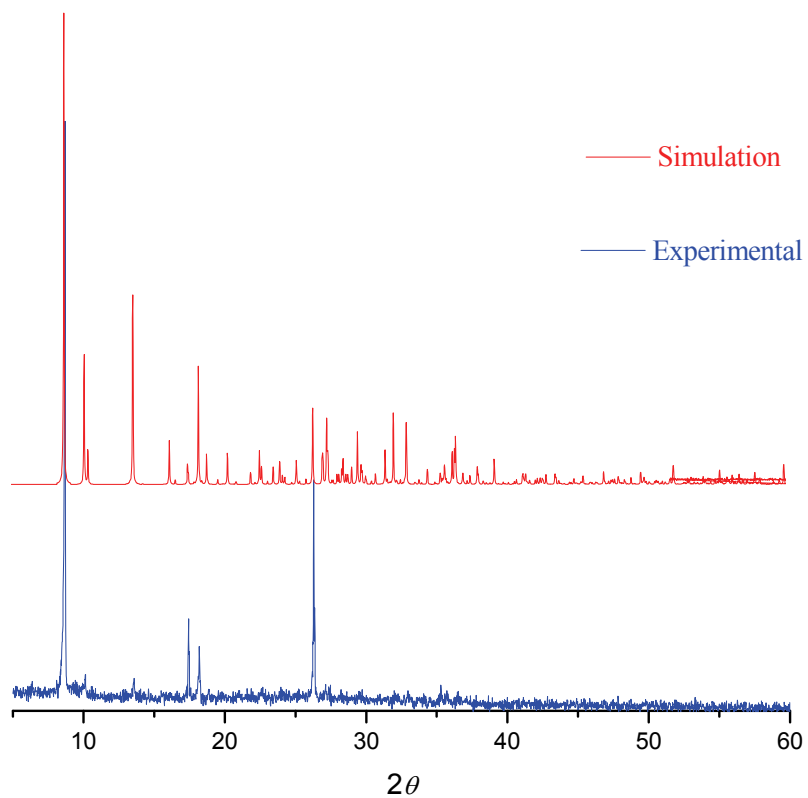

**Fig. S4.** Simulated PXRD pattern (red) and experimental PXRD pattern of **3**.

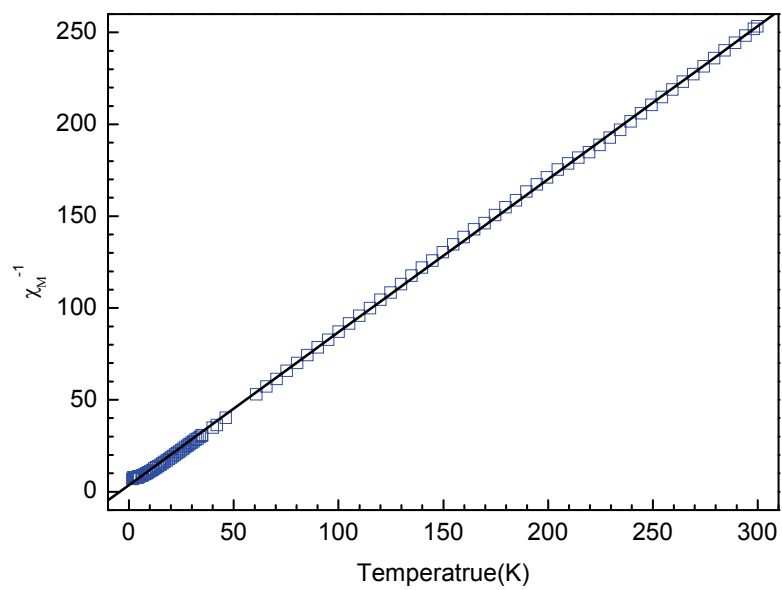

**Fig. S5.** Plots of  $\chi_M^{-1}$  vs.  $T$  for  $1 \cdot H_2O$ . The solid line is estimated from the Curie–Weiss law.

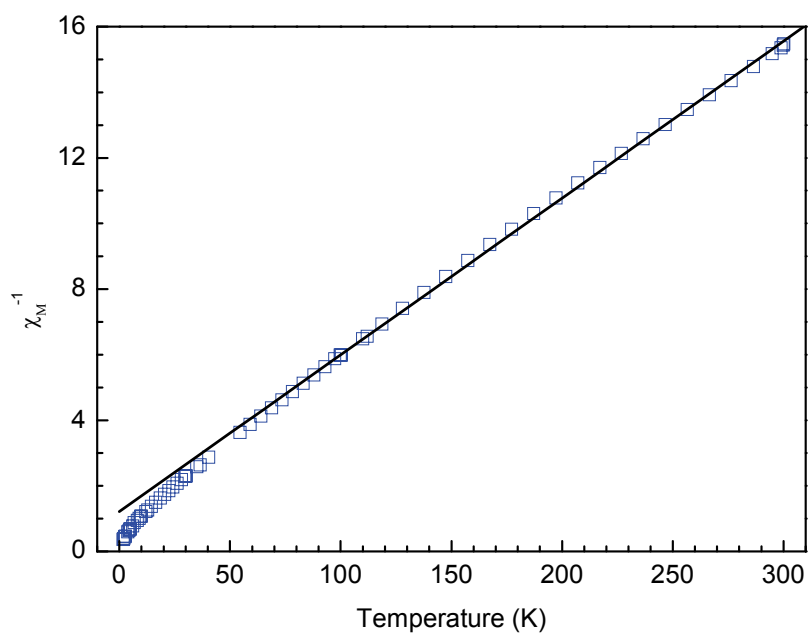

**Fig. S6.** Plots of  $\chi_M^{-1}$  vs.  $T$  for **3**. The solid line is estimated from the Curie–Weiss law.
